## 12 **Abstract**

13 Imprinting is a critical part of normal embryonic development in mammals, controlled by defined parent-  
14 of-origin (PofO) differentially methylated regions (DMRs) known as imprinting control regions. As we  
15 and others have shown, direct nanopore sequencing of DNA provides a mean to detect allelic methylation  
16 and to overcome the drawbacks of methylation array and short-read technologies. Here we leverage  
17 publicly-available nanopore sequence data for 12 standard B-lymphocyte cell lines to present the first  
18 genome-wide mapping of imprinted intervals in humans using this technology. We were able to phase  
19 95% of the human methylome and detect 94% of the well-characterized imprinted DMRs. In addition, we  
20 found 28 novel imprinted DMRs (12 germline and 16 somatic), which we confirmed using whole-genome  
21 bisulfite sequencing (WGBS) data. Analysis of WGBS data in *mus musculus*, rhesus macaque, and  
22 chimpanzee suggested that 12 of these are conserved. We also detected subtle parental methylation bias  
23 spanning several kilobases at seven known imprinted clusters. These results expand the current state of  
24 knowledge of imprinting, with potential applications in the clinic. We have also demonstrated that  
25 nanopore long reads, can reveal imprinting using only parent-offspring trios, as opposed to the large multi-  
26 generational pedigrees that have previously been required.

## 27 **Introduction**

28 The addition of a methyl group to the 5-carbon of cytidine is the most prevalent and stable epigenetic  
29 modification of human DNA (Laurent et al., 2010). DNA methylation is involved in gene regulation and  
30 influences a vast array of biological mechanisms, including embryonic development and cell fate, genome  
31 imprinting, X-chromosome inactivation, and transposon silencing (Moore et al., 2013; Smith and  
32 Meissner, 2013). In mammals, there are two copies or alleles of a gene, one inherited from each parent.  
33 Most gene transcripts are expressed from both alleles. However, there is a subset of genes which are  
34 expressed from a single allele either randomly such as in X-inactivation, or based upon PofO. The latter  
35 is known as imprinting (Chess, 2013; Khamlichi and Feil, 2018).

36 In imprinting, mono-allelic expression of a gene or cluster of genes is controlled by a *cis-acting* imprinting  
37 control region (ICR) (Bartolomei and Ferguson-Smith, 2011). The main mechanism by which this occurs  
38 is PofO-defined differential methylation at ICRs, also known as imprinted differentially methylated  
39 regions (DMRs) (Bartolomei and Ferguson-Smith, 2011; Maupetit-Méhouas et al., 2016). ICRs are  
40 classified as germline (or primary) or somatic (or secondary), hereinafter referred to as gDMR and sDMR.  
41 Germline ICRs are established during the first wave of methylation reprogramming at germ cell  
42 development and escape the second methylation reprogramming after fertilization (Zink et al., 2018).  
43 Secondary or somatic ICRs are established *de-novo* after fertilization during somatic development, usually  
44 under the control of a nearby primary ICR (Zink et al., 2018). Imprinted clusters of genes may span up to  
45 ~4 Mb, by acting through a CCCTC-binding factor (CTCF) binding site or by allelic expression of a long  
46 non-coding RNA (Bartolomei and Ferguson-Smith, 2011; da Rocha and Gendrel, 2019). By contrast,  
47 individually-imprinted genes are typically regulated by PofO-derived differential methylation at the gene  
48 promoter (Bartolomei and Ferguson-Smith, 2011).

49 Imprinting is implicated in various genetic disorders, either from aberrations in imprinting itself, or from  
50 deleterious variants affecting the expressed allele at an ICR. Loss of imprinting is also widely observed in  
51 human cancers (Goovaerts et al., 2018; Jelinic and Shaw, 2007; Tomizawa and Sasaki, 2012). Thus,  
52 accurate mapping and characterization of ICRs in humans is key to the treatment and actionability of  
53 genetic disorders, and to personalized oncogenomics.

54 To detect ICRs, accurate assignment of methylation data to paternal and maternal alleles is required.  
55 Achieving this with traditional bisulfite sequencing or arrays is challenging. Several studies have used  
56 samples with large karyotypic abnormalities, such as uniparental disomies (UPDs), teratomas, and  
57 hydatidiform moles, to infer regions of imprinting [14–16]. This approach relies on rare structural variants,  
58 but also on the assumption that both normal methylation and the imprinted state remain intact in spite of  
59 substantial genomic aberrations. A much larger study by Zink *et al.* leveraged a genotyped, multi-  
60 generation pedigree spanning nearly half the population of Iceland (n=150,000), in combination with  
61 whole genome oxidative bisulfite sequencing (oxBS-Seq), to phase methylation and infer parent-of-origin  
62 (Zink et al., 2018). However, despite being able to phase nearly every SNP in that cohort, they were only  
63 able to phase 84% of CpG methylation (CpGs on chromosomes 1-22) in over 200 samples due to the short  
64 length of reads. Further, that study was based on a single, genetically-isolated population, which may not  
65 be representative of the wider human population. A comprehensive mapping of ICRs using a technology  
66 more suited to phasing reads, based on individuals more representative of the human population, could  
67 greatly advance our understanding of imprinting, with direct benefits for human health.

68 We have previously shown that nanopore sequencing can detect allelic methylation in a single sample and  
69 accurately determine PofO using only trio data. We also developed the software NanoMethPhase for this  
70 purpose (Akbari et al., 2021). Here, we applied NanoMethPhase to public nanopore data from a diverse  
71 set of 12 lymphoblastoid cell lines (LCLs) from the 1,000 Genomes Project (1KGP) and Genome in a  
72 Bottle (GIAB) to investigate genome-wide allele-specific methylation (ASM) and detect novel DMRs

73 (Figure 1A) (Auton et al., 2015; De Coster et al., 2019; Jain et al., 2018; Shafin et al., 2020; Zook et al.,  
74 2019, 2016). Using trio data from 1KGP for these cell lines we phased nanopore long reads to their PofO  
75 and inferred allelic methylation (Akbari et al., 2021; Auton et al., 2015). Nanopore was able to detect  
76 haplotype and methylation status for 26.5 million autosomal CpGs (Chromosomes 1-22), which represents  
77 95% of the autosomal CpGs in the GRCh38 (Kent et al., 2002). We further used public whole-genome  
78 bisulfite sequencing (WGBS) data to confirm the presence of the detected DMRs in other tissues and to  
79 class the novel DMRs as being germline or somatic. We captured 94% of the well-characterized DMRs  
80 (Those reported by at least two studies) and detected 28 novel DMRs (12 germline and 16 somatic). We  
81 determined that 43% of these novel DMRs show evidence of conservation in rhesus macaque and  
82 chimpanzee. Collectively, our results extend the set of known imprinted intervals in human and  
83 demonstrate a major contribution in our ability to characterize imprinting by ASM, brought about by the  
84 capabilities of nanopore sequencing.

## 85 **Results**

### 86 **Assessing the Effectiveness of Nanopore Methylation Calling and Detection of Known Imprinted** 87 **DMRs**

88 We performed correlation analysis among cell lines and NA12878 nanopore-called methylation with  
89 WGBS data (ENCFF835NTC) to confirm the reliability of methylation calling (Figure 1B). We observed  
90 high correlation across cell lines ( $r = 0.75-0.93$ ), as expected due to their being the same cell type.  
91 NA12878 nanopore-called methylation also showed the highest correlation ( $r = 0.89$ ) with NA12878  
92 WGBS (Figure 1B), as expected. Additionally, to examine performance on detection of known DMRs,  
93 we gathered the list of reported DMRs from previous studies (Court et al., 2014; Hernandez Mora et al.,  
94 2018; Joshi et al., 2016; Zink et al., 2018). This included 383 imprinted intervals, of which 68 we assigned  
95 as “well-characterized” because they were reported by at least two genome-wide mapping studies or were  
96 previously known to be imprinted (Supplementary file1). Subsequently, we haplotyped the methylome in  
97 each cell line, performed differential methylation analysis (DMA) between alleles across cell lines. 95%  
98 (26.5M) of human autosomal CpGs could be assigned to a haplotype. We detected 172 allelic DMRs ( $p$ -  
99 value  $< 0.001$ ,  $|\text{methylation difference}| > 0.25$ , and detected in at least 4 cell lines in each haplotype). See  
100 supplementary file 2 for more details. Of the 172 detected DMRs, 96 (56%) overlapped with at least one  
101 previously reported, while the remaining 76 (44%) were novel. Of the well-characterized DMRs, 64/68  
102 (94%) were detected in our study (Figure 1C, supplementary file2). All DMRs which overlapped with  
103 previously-reported DMRs displayed consistent PofO with those studies.

104 We similarly examined the power of nanopore sequencing to detect allelic DMRs within a single sample,  
105 by comparing to previous studies (Court et al., 2014; Hernandez Mora et al., 2018; Joshi et al., 2016; Zink  
106 et al., 2018). On average, 88% ( $M \pm SD = 24.5M \pm 1.7M$ ) of the human methylome could be assigned to  
107 a parental haplotype in each LCL. Of the well-characterized DMRs, ~71% ( $M \pm SD = 48 \pm 4.8$ ) could be

108 detected in a single LCL. An additional 32 DMRs ( $SD = 9.7$ ) reported by only one previous study were  
109 detected in each sample (Supplementary figure S1).

110

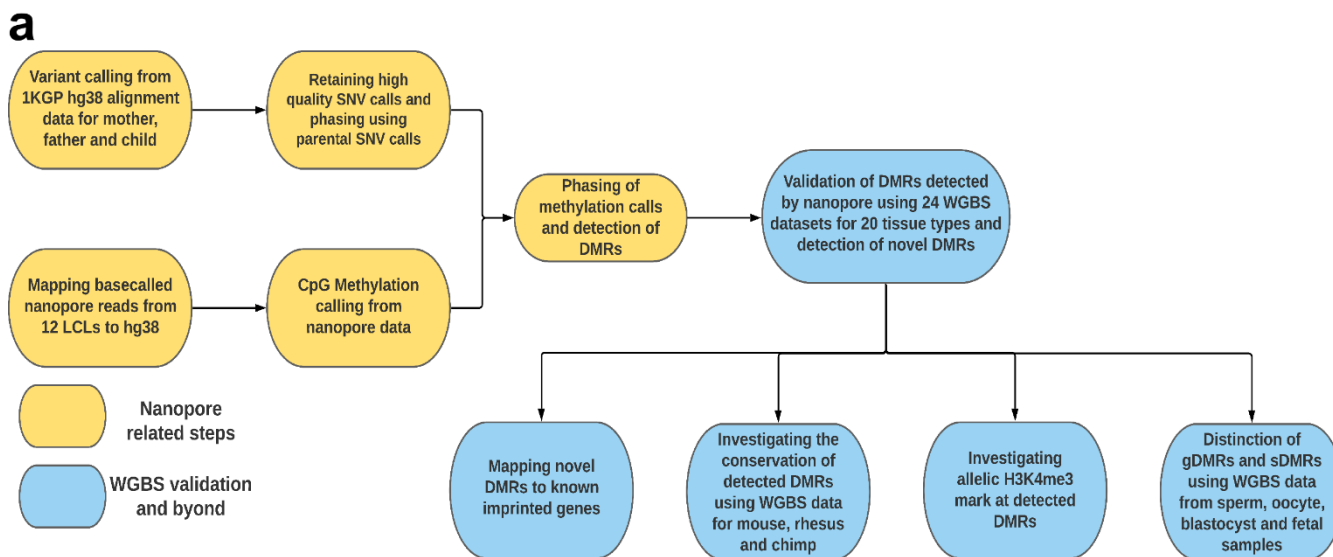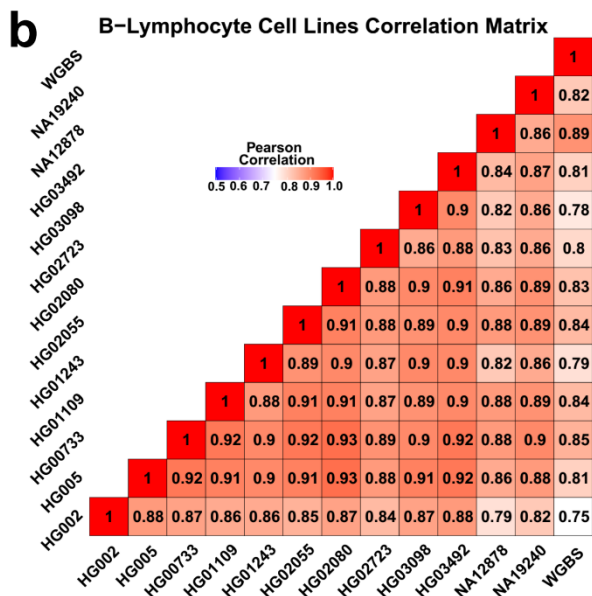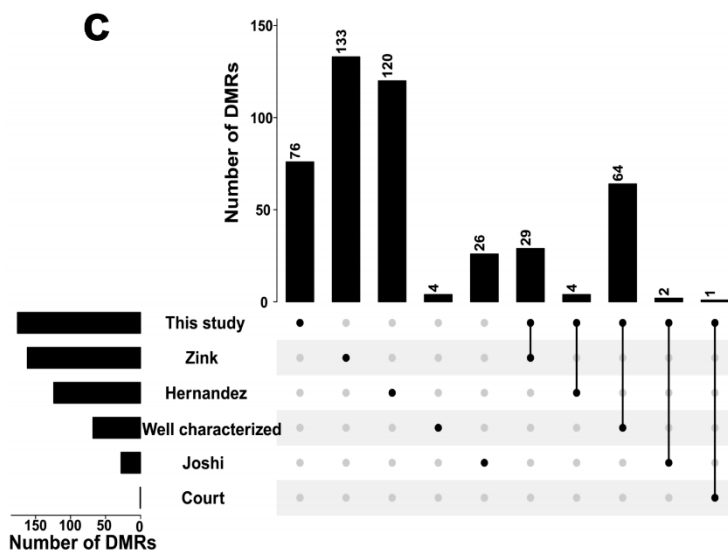

Figure 1: Detection of allelic methylation using nanopore sequencing. a) The flowchart of the study representing all the analysis steps. b) Pearson correlation matrix of the nanopore CpG methylation frequencies for the 12 LCLs and NA12878 whole-genome bisulfite sequencing (WGBS) from ENCODE (ENCFF835NTC). c) Upset plot of the number of DMRs detected in our study and previous studies and their overlaps.



## 111 **Confirmation of Novel Imprinted DMRs**

112 As noted above, we detected 76 allelic DMRs that did not overlap with previously-reported ICRs (Court  
113 et al., 2014; Hernandez Mora et al., 2018; Joshi et al., 2016; Zink et al., 2018). In order to determine  
114 their validity as novel DMRs, we used 24 WGBS datasets from 20 tissue samples within the Roadmap  
115 Epigenomics Project (See materials and methods) (Bernstein et al., 2010). We first examined the 96  
116 allelic DMRs which overlapped with the reported DMRs. 79 out of 96 DMRs that overlapped with  
117 reported regions showed adjusted p-value (FDR)  $< 5 \times 10^{-6}$  and log fold change  $> 0.15$ , while only 5, 6,  
118 7, and 8 intervals were detected as significant in the control intervals including 200 randomly selected  
119 1kb bins, CpG islands, 2kb, and 3kb bins, respectively (Figure 2A, Supplementary file 3). Applying this  
120 approach to the 76 not previously reported DMRs, the WGBS data supported 28 significant DMRs  
121 (Figure 2A and 2B, Supplementary file 3). In agreement with previous studies reporting higher number  
122 of maternally methylated intervals, 10 of the 28 novel DMRs were paternally methylated and 18 were  
123 maternally methylated (Court et al., 2014; Hernandez Mora et al., 2018; Joshi et al., 2016). Overall, 107  
124 out of 172 DMRs were validated in tissue WGBS data from which 28 were novel and 79 were reported  
125 by the previous studies (Figure 2C, Supplementary file 2) (Court et al., 2014; Hernandez Mora et al.,  
126 2018; Joshi et al., 2016; Zink et al., 2018).

127 We also sought to examine the significance of the other 283 previously reported imprinted regions  
128 which did not overlap with our detected DMRs. We examined these 283 DMRs in WGBS data and only  
129 139/283 DMRs (49%) were significant (adjusted p-value (FDR)  $< 5 \times 10^{-6}$  and log fold change  $> 0.15$ .  
130 Supplementary file 4). We also mapped these 283 intervals to the DMRs detected in each LCL sample.  
131 81/283 (27%) of them were detected in at least one sample with consistent reported PofO, of which 41  
132 were in common with WGBS analysis (Supplementary file 5).

133

134

## 135 **Determination of Germline vs Somatic Status of Novel Imprinted DMRs**

136 We performed DMA between oocyte and sperm and overlapped detected DMRs to the 28 novel DMRs.  
137 12 of the novel DMRs overlapped with DMRs from oocyte versus sperm (p-value < 0.001, |methylation  
138 difference| > 0.25, and more than 40% methylation in oocyte and less than 20% in sperm and vice versa)  
139 from which 11 were maternally methylated and 1 was paternally methylated (Figure 3). We then examined  
140 the methylation of somatic and germline DMRs in early human embryonic cells and fetal tissues to  
141 investigate whether the imprinting of the 12 candidate gDMRs survived the second round of de- and re-  
142 methylation and if the other 16 novel sDMRs were established during development. We used blastocyst  
143 WGBS data from early cleavage-stage embryos and fetal tissue (Bernstein et al., 2010; Okae et al., 2014).  
144 All novel candidate gDMRs showed partial methylation in the blastocyst indicating the gDMRs escaped  
145 de-methylation after fertilization (Figure 3). All novel gDMRs and sDMRs displayed partial methylated  
146 in fetal tissues indicating survival of gDMRs during somatic development and establishment of sDMRs.  
147 Overall, 12 of the novel DMRs detected to be germline while 16 detected as sDMRs (Figure 2C and Figure  
148 3, Supplementary file 6).

149

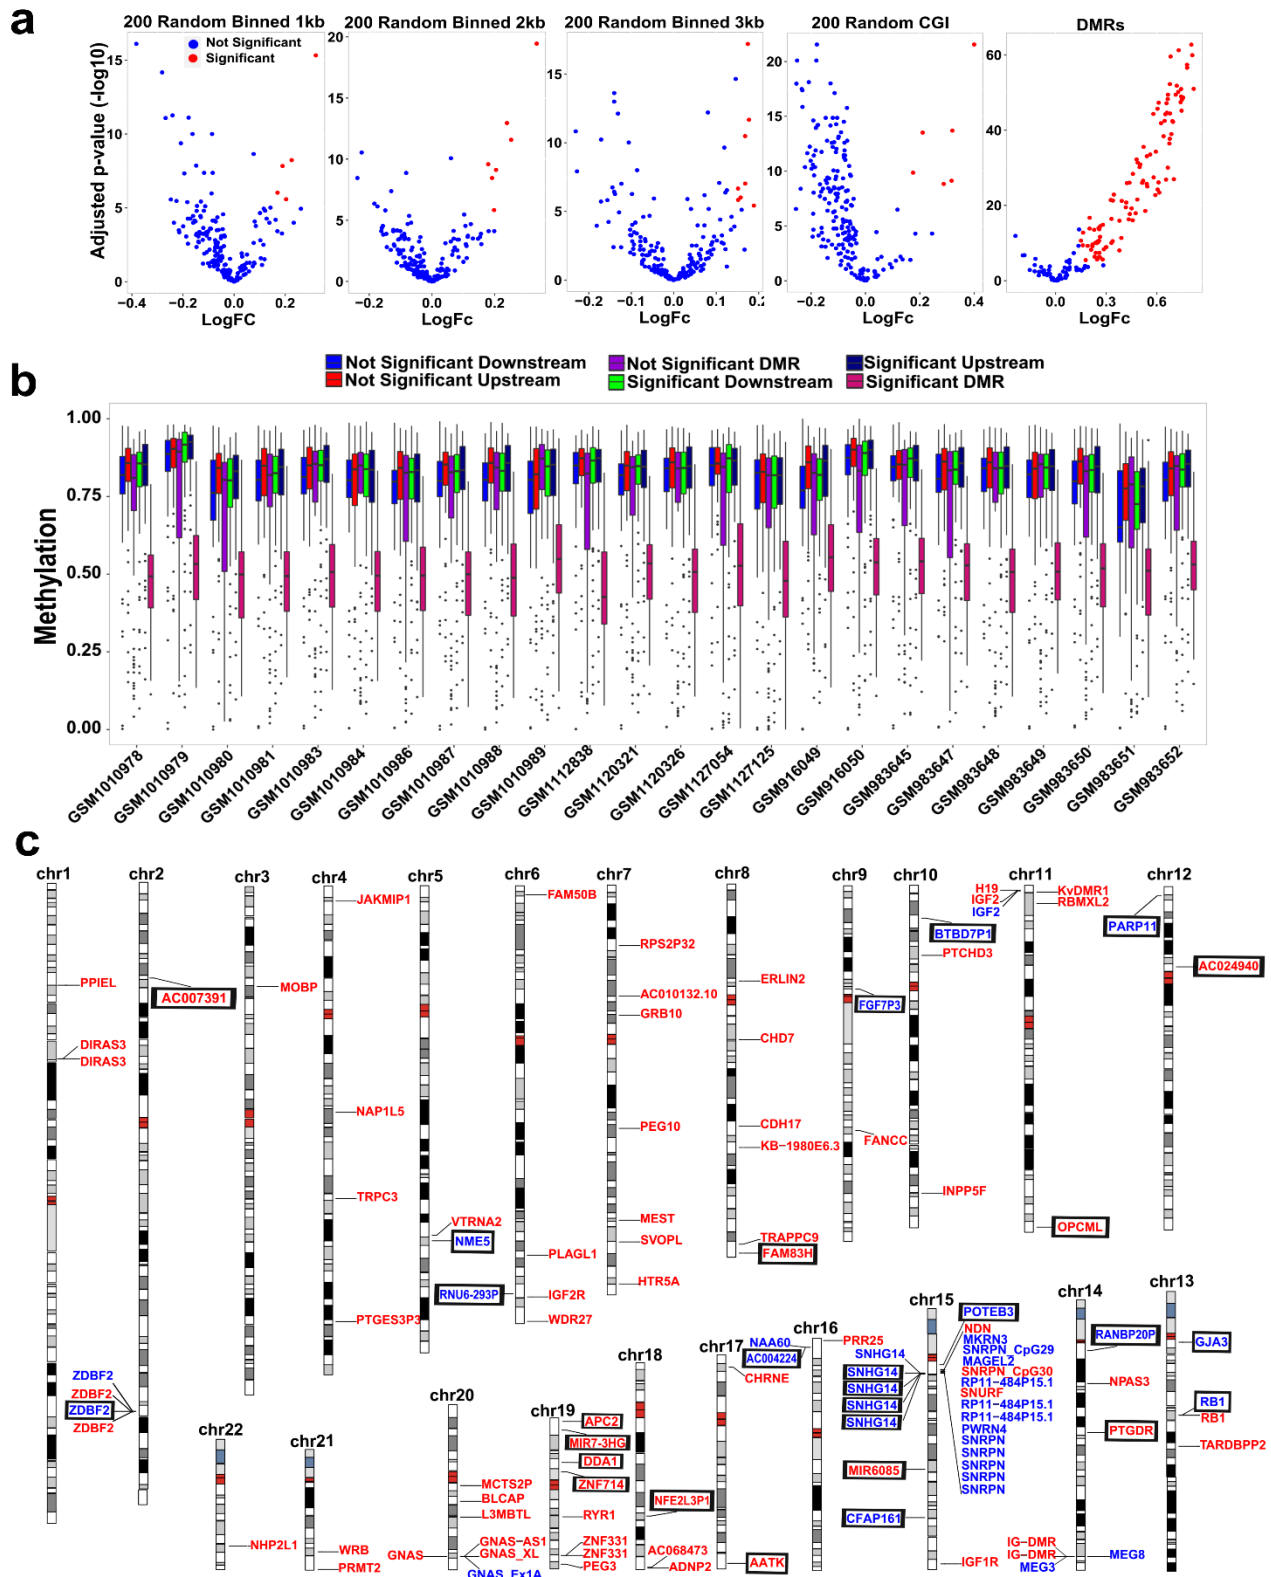

Figure 2: Validation of nanopore-detected DMRs using WGBS data. a) Volcano plots representing limma results for partial methylation (30%-70%) analysis of nanopore-detected DMRs in 24 WGBS datasets from 20 tissue types. 200 randomly selected CpG islands, 1kb, 2kb, and 3kb intervals are examined as controls. Red dots adjusted p-value (FDR)  $< 5 \times 10^{-6}$  and log fold change  $> 0.15$ . b) Box plot showing partial methylation at significant DMRs while not significant DMRs and adjacent regions (down- and upstream to significant and not significant DMRs) are not partially methylated. c) Idiogram of the 107 DMRs which validated by WGBS. On the left on each chromosome are paternally methylated DMRs and on the right are maternally methylated DMRs. Red color represents gDMRs and blue represents sDMRs. Novel DMRs are boxed and named based on their nearest gene (Ensembl Gene 103 GRCh38.p13).

150

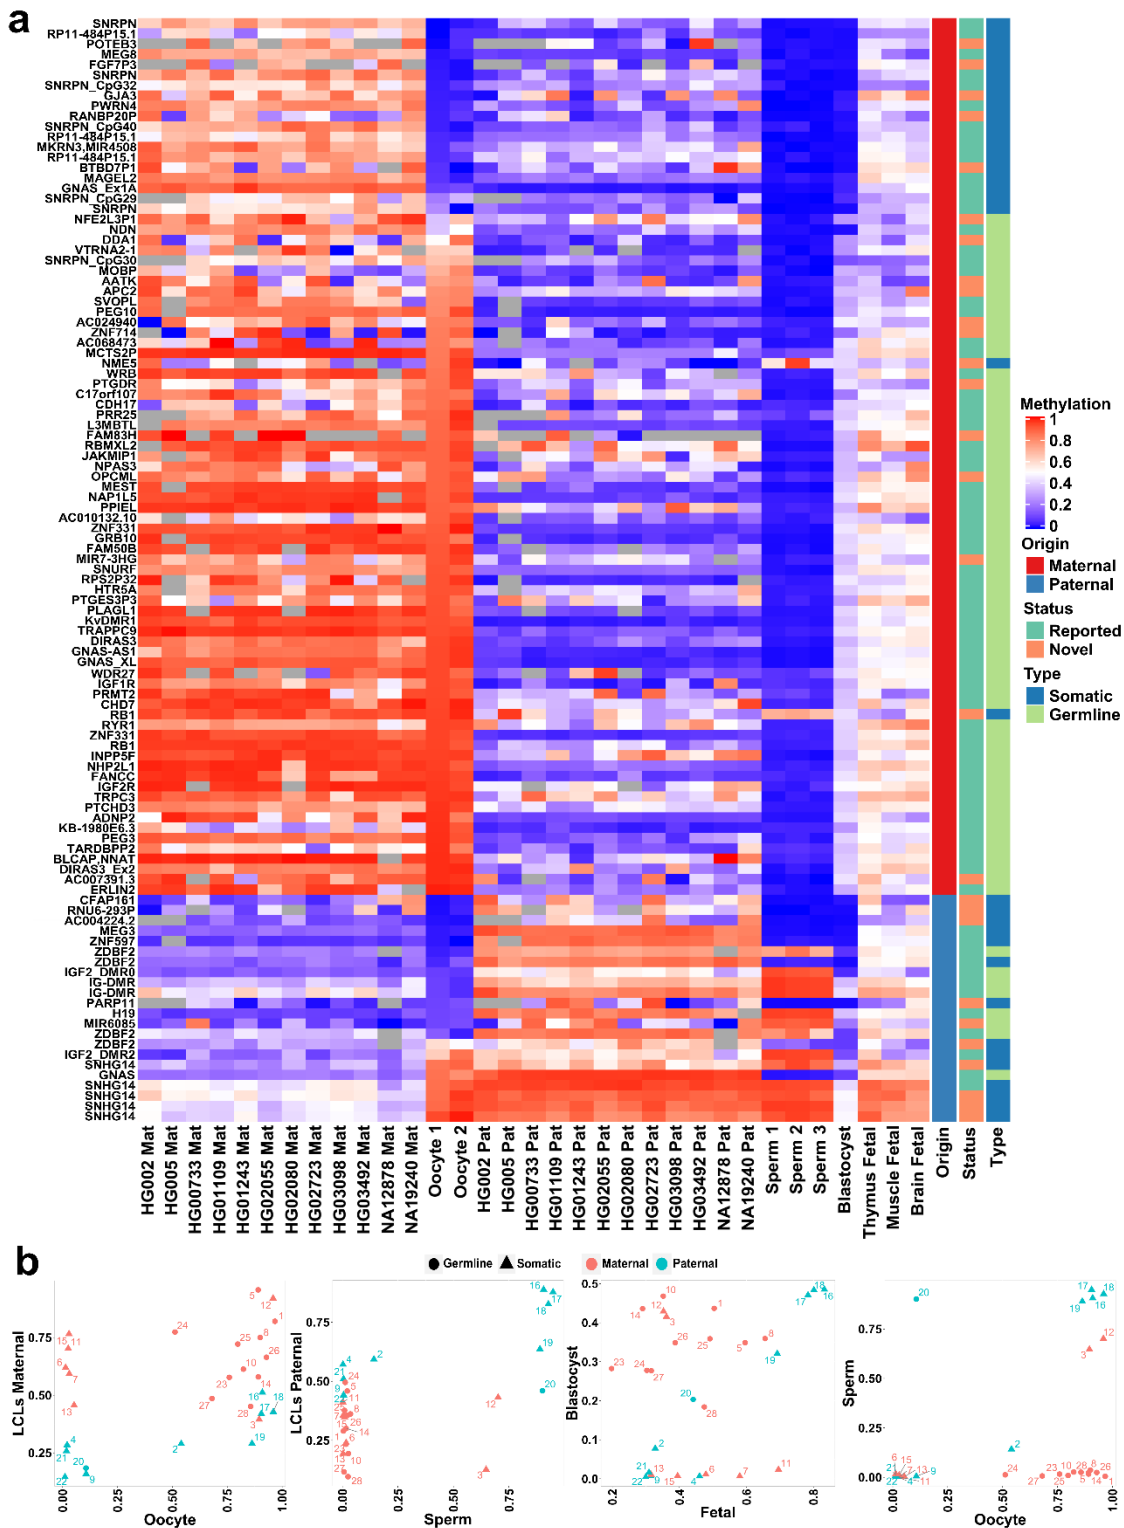

Figure 3: Detection of novel gDMRs and sDMRs. a) Heatmap displaying average methylation of the 107 nanopore-detected DMRs which validated by WGBS. Average allelic methylation at each DMR for LCL samples are represented. Average methylation of each DMR for gametes and early developmental WGBS samples are displayed. Novel DMRs are named based on their nearest gene (Ensembl Gene 103 GRCh38.p13). b) Dot plots representing the methylation of novel gDMRs and sDMRs in each sample in respect to other sample. Maternally methylated gDMRs display high methylation in oocyte and very low or no methylation in sperm and are partially methylated in blastocyst and fetal samples. Paternally methylated gDMRs display high methylation in sperm and very low or no methylation in oocyte and are partially methylated in blastocyst and fetal samples. Somatic DMRs do not display relevant methylation in sperm or oocyte and are methylated or unmethylated in both sperm and oocyte while they display parental methylation bias in LCLs and partial methylation in fetal samples. For ease in visualization DMR IDs are shown (Supplementary file 6).

## 151 **Allelic Histone Methylation of H3K4 is Enriched at Germline DMRs**

152 The H3K4me3 histone mark is protective to DNA methylation. At ICRs, the unmethylated allele is usually  
153 enriched for this histone modification (Court et al., 2014; John and Lefebvre, 2011). We used H3K4me3  
154 chromatin immunoprecipitation sequencing (ChIP-seq) data for 7 LCLs and their heterozygous single-  
155 nucleotide variant (SNV) calls from 1KGP. 81/107 of the detected DMRs could be examined (See material  
156 and methods). Of these, 42 reported and 9 novel DMRs showed a significant allelic count in ChIP-seq  
157 data (Fisher's combined p-value binomial  $< 0.01$ ) (Supplementary files 6 and 7). Among the 7 LCLs with  
158 ChIP-seq data, only NA12878 and NA19240 were among LCLs with nanopore data and a phased  
159 methylome. Therefore, we examined if the allelic H3K4me3 and methylation are in opposite alleles in  
160 these cell lines. 23 reported and 5 novel DMRs were significant for allelic H3K4me3 in NA12878 and/or  
161 NA19240. 21 reported and 4 novel DMRs showed opposite allelic bias state between H3K4me3 and  
162 methylation (Supplementary file 7).

163 Allelic H3K4me3 mostly overlapped with gDMRs. Overall, 75% of assessable gDMRs and 39% of  
164 sDMRs were significant for allelic H3K4me3. This is consistent with previous studies demonstrating the  
165 protective role of H3K4me3 against DNA methylation, specifically at germline ICRs in the second round  
166 of re-methylation during implantation and somatic development (Chen and Zhang, 2020; Hanna and  
167 Kelsey, 2014).

## 168 **Conservation of Detected Imprinted DMRs across Mammals**

169 To investigate the conservation of detected DMRs and determine if any of the novel DMRs are conserved  
170 in mammals we used WGBS data from house mouse (*Mus musculus*), rhesus macaque (*Macaca mulatta*)  
171 , and chimpanzee (*Pan troglodytes*) (Hon et al., 2013; Jeong et al., 2021; Tung et al., 2012). We examined  
172 whether any of the orthologous regions in these mammals display significant partial methylation  
173 (Materials and Methods). Of the 107 DMRs detected by nanopore and validated in WGBS data, 71, 105

174 and all 107 had orthologs in mouse, rhesus and chimp, respectively. Orthologs of the 77/107 detected  
175 DMRs showed significant partial methylation in at least one of the three mammals (Figure 4A,  
176 Supplementary file 6 and 8). Of these, 65 were reported DMRs (56 well-characterized) and 12 novel  
177 DMRs. We detected 24 significant orthologous DMRs in mouse. 18 of these were reported to be imprinted  
178 by previous studies in mouse (Gigante et al., 2019; Xie et al., 2012). All significant DMRs in mouse,  
179 except one, were also significant in rhesus and/or chimp suggesting their existence in their common  
180 ancestor. These DMRs mapped to well-known imprinted clusters including *KCNQ1*, *H19*, *GNAS*,  
181 *SNURF/SNRPN*, *PLAGL*, *SGCE*, *BLCAP*, *PEG3*, *PEG10*, *PEG13*, *GRB10*, *BLCAP*, *NAP1L5*, *INPP5F*,  
182 and *MEG3* where their allelic PofO expression has already been reported in mouse and other mammals  
183 (“Geneimprint,” 2021; Morison et al., 2001).

184 Sperm, oocyte and embryo WGBS data for mouse and rhesus were used to investigate if the DMRs that  
185 detected as germline or somatic in human are germline or somatic in these mammals and vice versa  
186 (Dahlet et al., 2020; Gao et al., 2017; Jung et al., 2017; Saenz-de-Juano et al., 2019). 62 of the human  
187 DMRs had significant orthologs in rhesus. Of these, 51 were germline and 11 were somatic in human and  
188 in rhesus 45 were germline and 17 were somatic (More than 40% methylation in oocyte and less than 20%  
189 in sperm and vice versa with  $|\text{methylation difference}| > 0.25$ . Figure 4B). 24 human DMRs had significant  
190 orthologs in mouse. Of these, 21 were germline and 3 were somatic in human and in mouse 17 were  
191 germline and 7 were somatic (Figure 4B). Nine gDMRs in human were somatic in rhesus and/or mouse  
192 and three gDMRs from mouse or rhesus were somatic in human. This is consistent with previous studies  
193 indicating imprinting is largely conserved in mammals while ICR identity at the germline stage is not  
194 completely conserved (Cheong et al., 2015).

195

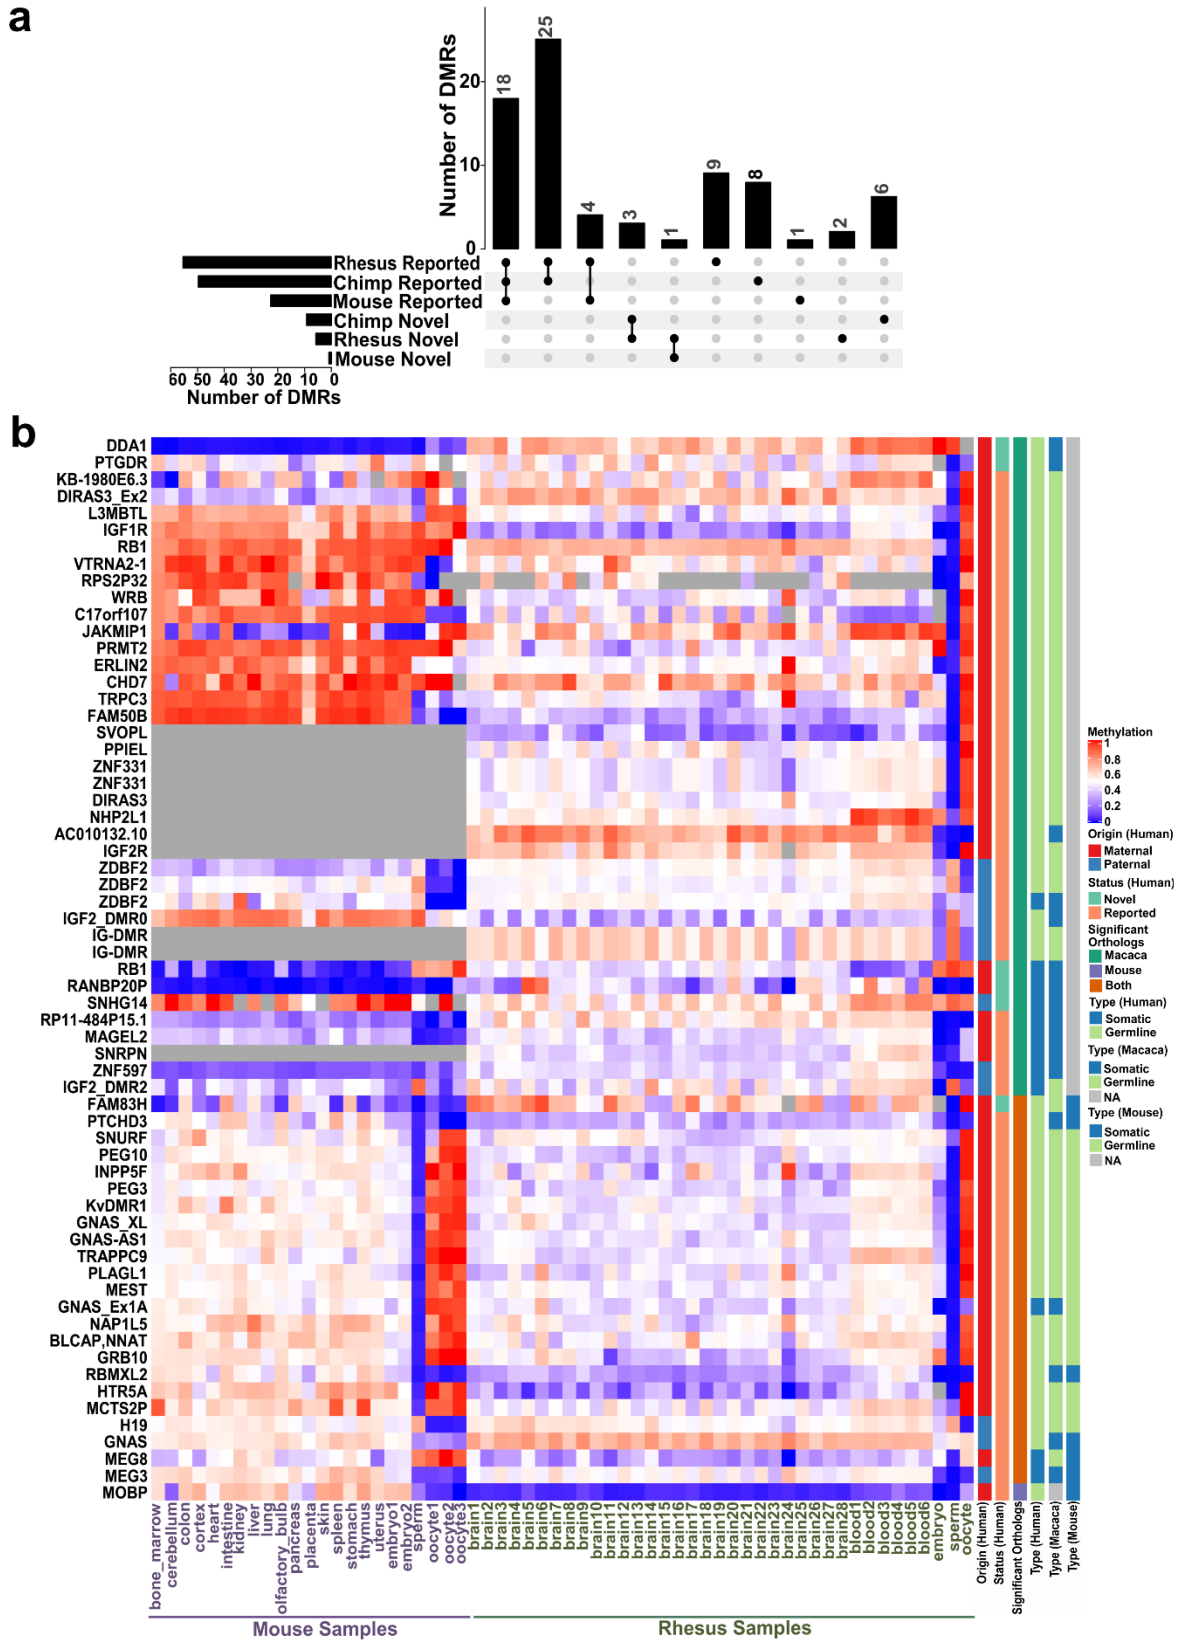

## 196 **Novel DMRs within Known Imprinted Gene Domains and Contiguous Blocks of** 197 **Parental Methylation Bias**

198 We gathered the list of 259 imprinted genes from previous studies (Supplementary file 9) (Babak et al.,  
199 2015; Baran et al., 2015; “Geneimprint,” 2021; Jadhav et al., 2019; Morison et al., 2001; Zink et al.,  
200 2018). 14 novel DMRs (6 germline and 8 somatic) mapped close (<1.03Mb) to imprinted genes  
201 (Supplementary file 6 and 10).

202 Of the 8 sDMRs close imprinted genes, only one mapped to a CpG island, and that was a small  
203 (<300bp) CpG island ~13 Kb downstream of the maternally expressed *NAA60* gene (Supplementary  
204 figure S2). Four novel sDMRs (All paternally methylated) mapped in the Prader-Willi syndrome and  
205 Angelman syndrome (PWS/AS) cluster. Previous studies reported continuous subtle paternal  
206 methylation bias at the PWS/AS cluster (Hernandez Mora et al., 2018; Joshi et al., 2016; Zink et al.,  
207 2018). Consistent with previous studies, the four novel sDMRs at this cluster were large (>5Kb) and  
208 seemed to constitute near-continuous paternal methylation spanning a ~200kb region. This included the  
209 *SNORD116* cluster genes and several other genes such as *PWARI* and *6*, *PWARSN* and *IPW*  
210 (Supplementary figure S3). This paternally methylated somatic block is downstream of the maternally  
211 methylated germline *SNURF/SNRPN* ICR, which is associated with PWS and shows evidence of  
212 conservation in chimp, rhesus, and mouse. Moreover, the allele-specific expression (ASE) track from  
213 Zink *et al.* displayed strong paternal expression across this ~200kb region (Zink et al., 2018). Another  
214 three novel sDMRs mapped close *RBI/LPAR6*, *IGF2R* (Supplementary figures S4 and S5) and *GPR1-*  
215 *AS/ZDBF2*. The novel sDMR at *GPR1-AS/ZDBF2* were close to 2 known paternal gDMRs. Moreover,  
216 LCLs PofO methylation track at the *ZDBF2* gene body showed continuous subtle paternal bias.  
217 Together, these suggest a ~65kb paternally methylated block interrupted by unmethylated CpG island at  
218 *ZDBF2* promoter (Supplementary figure S6). In addition to blocks with novel DMRs, we sought to  
219 detect continuous block of parental methylation bias at other regions. We detected 5 other contiguous



220 blocks of imprinting at *ZNF331*, *KCNQ1OT1*, *GNAS*, *L3MBTL1* and *ZNF597/NAA60*, ranging from 35-  
221 58Kb in size (Supplementary figures S7-11).

222 All the six gDMRs within imprinted gene domains were maternally methylated and they all mapped to  
223 CpG islands except a DMR mapped in the *AC024940.1 (OVOS2)* (Supplementary figures S12-16,  
224 Figure 5). Five of them mapped to known imprinted genes without previously reported DMR or a DMR  
225 with a much greater distance from the gene compared to our DMRs including *AC024940.1*, *ZNF714*,  
226 *DDAI1*, *ADAMTSL5*, and *NAPRT* (Court et al., 2014; Hernandez Mora et al., 2018; Joshi et al., 2016;  
227 Zink et al., 2018). A novel gDMR mapped to the promoter of *ZNF714* which is reported to be  
228 paternally expressed (Jadhav et al., 2019; Zink et al., 2018). Thus suggesting this DMR could be the  
229 potential ICR and directly suppress maternal allele by blocking its promoter (Figure 5). *AC024940.1*  
230 reported to be paternally expressed (Zink et al., 2018). A novel germline maternal DMR mapped near  
231 the end of the *AC024940.1* gene (encompassing the intron 38 to the start of exon 40) adjacent to a CTCF  
232 binding site (Supplementary figure S12). *DDAI1* and *ADAMTSL5* have been previously reported to be  
233 maternally expressed and *NAPRT* has an isoform dependent expression origin (Babak et al., 2015; Zink  
234 et al., 2018). A gDMR mapped to the end and downstream of *DDAI1* gene (Supplementary figure S13).  
235 For *ADAMTSL5* and *NAPRT*, gDMRs mapped close to these genes (<150Kb) (Supplementary figures  
236 S14 and S15).

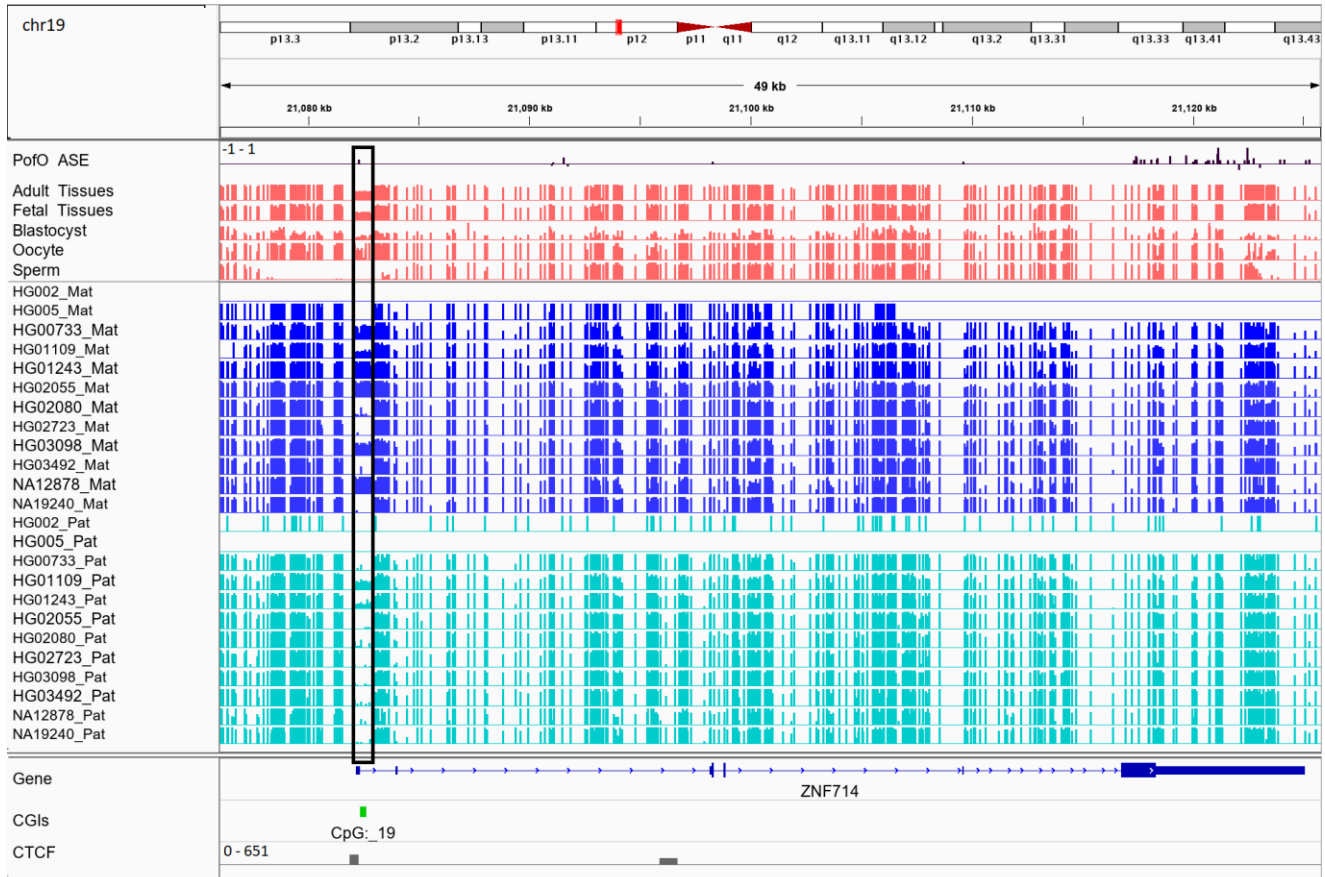

Figure 5: IGV screenshot of the novel maternally methylated germline DMR at the promoter of the paternally expressed ZNF714 gene. Black box region represents the DMR. PofO\_ASE represents allele specific expression track from Zink *et al.* without any filtering for *P value* and positive vertical bars (upward) represents more paternal expression and negative bars (downward) maternal expression. The range for all methylation tracks is 0-1. Adult tissues track represents the average methylation of 24 WGBS data from 20 tissue samples and fetal tissues track is the average methylation of 3 fetal WGBS tissue samples. These WGBS samples obtained from Roadmap Epigenomics Project. Blastocyst, oocyte and sperm tracks are the methylation from one blastocyst, and average methylation from two oocytes, and three sperm samples from Okae *et al.*, 2014.

## 238 Discussion

239 Here we described the first genome-wide map of human allele-specific methylation using nanopore  
240 sequencing. Leveraging long reads and parental SNVs allowed us to phase methylation for ~26.5 million  
241 autosomal CpGs representing 95% of the CpGs in the human autosomal genome (GRCh38) across 12  
242 LCLs (De Coster et al., 2019; Kent et al., 2002; Shafin et al., 2020; Zook et al., 2016). This represents a  
243 much higher resolution than previous studies aimed to capture allelic methylation (Court et al., 2014;  
244 Hernandez Mora et al., 2018; Joshi et al., 2016; Zink et al., 2018). For example, Zink *et al.* determined  
245 the PofO of almost all genotypes using nearly half the population of Iceland (n=150,000) and used over  
246 200 whole-genome OxBS-seq samples to detect imprinting (Zink et al., 2018). They could define PofO  
247 methylation for ~23.5 million autosomal CpGs (84%). We noticed three of our novel DMRs did not have  
248 any CpG representation from Zink *et al.* Moreover, in a further three other novel DMRs, fewer than 60%  
249 of the CpGs were captured in Zink *et al.* (Supplementary file 6). EPIC methylation arrays detect over 850k  
250 CpGs and covers almost all CpGs detectable by 450k and 27k methylation arrays. Seven of our novel  
251 DMRs did not have any CpGs covered by the EPIC array and 9 other novel DMRs had only 1 or 2 probes  
252 on this platform (Supplementary file 6). This highlights the breadth of nanopore sequencing for the  
253 purposes of ICR calling.

254 Even though we detected methylation for all the CpGs in the human genome (GRCh38), we were not able  
255 to phase 5% of the human methylome (Kent et al., 2002). To phase nanopore reads, we used SNVs  
256 detected from short-reads data in the 1KGP (Auton et al., 2015). Short-reads are challenging to map to  
257 complex repetitive regions which results in lack of SNVs and subsequent inability to phase reads in these  
258 regions. 75% of the unphased CpGs mapped to the ENCODE blacklist (Amemiya et al., 2019). We  
259 previously demonstrated that using SNVs detected from nanopore to phase reads results in reliable  
260 methylation phasing and detection of a few more reported DMRs (Akbari et al., 2021). Improvement in

261 basecalling and variant calling from nanopore reads could enable the phasing of a complete genome-wide  
262 methylome using nanopore detected SNVs.

263 Using nanopore sequencing we could capture 94% of the well-characterized DMRs and 35 of the DMRs  
264 reported by only one study (Court et al., 2014; Hernandez Mora et al., 2018; Joshi et al., 2016; Zink et al.,  
265 2018). However, we were unable to detect a further 283 DMRs, mostly reported by one previous study  
266 (Court et al., 2014; Hernandez Mora et al., 2018; Joshi et al., 2016; Zink et al., 2018). In further analyses,  
267 180 of these DMRs were detected in at least one nanopore-sequenced LCL sample and/or validated in the  
268 Roadmap multi-tissue WGBS data we used (Supplementary files 4 and 5). We should note that nanopore  
269 data comes from a small number of B-lymphocyte cell-line samples, yet considerably diverse in ethnicity.  
270 Imprinted DMRs can be tissue-specific and polymorphic across individuals, which may explain this  
271 discrepancy (Court et al., 2014; Hernandez Mora et al., 2018; Joshi et al., 2016; Romanelli et al., 2014;  
272 Silver et al., 2015; Zink et al., 2018). Characterization of imprinted DMRs across a wider range of tissues  
273 and populations represents a clear path forward for the field. The ability of nanopore sequencing to  
274 characterize imprinting using only parent-offspring trios represents a relatively low-cost avenue by which  
275 this might be achieved.

276 We detected 107 DMRs using nanopore which were further confirmed in multi-tissue WGBS data. Twelve  
277 of these were novel gDMRs and sixteen were novel sDMRs not reported in previous studies (Court et al.,  
278 2014; Hernandez Mora et al., 2018; Joshi et al., 2016; Zink et al., 2018). These novel DMRs were  
279 supported by several lines of evidence in our analyses. 1) They displayed significant PofO methylation  
280 bias in nanopore LCLs. 2) They were significantly partially methylated in WGBS data from 20 human  
281 tissues. 3) gDMRs demonstrated escape from the second de-methylation step. 4) They were partially  
282 methylated in three fetal tissue samples. 5) 43% of those for which H3K4me3 ChIP-seq data could be  
283 phased showed significant allelic H3K4me3. 6) 43% showed evidence of conservation in at least one of  
284 the three mammals including chimp, rhesus, and mouse. 7) 71% mapped to at least one regulatory region

285 including CpG island, CTCF binding site and enhancer. These novel DMRs represent a substantial and  
286 well-validated expansion of known regions of imprinting, which may aid future research and diagnosis in  
287 the fields of genetic medicine and oncology.

288 Of the 107 DMRs, 20 mapped to the PWS/AS cluster. Previous studies demonstrated two paradigms of  
289 imprinting at this cluster, either PofO methylation confined to particular regulatory regions such as CpG  
290 islands or subtle paternal bias across this cluster with spikes of maternal methylation (Court et al., 2014;  
291 Joshi et al., 2016; Sharp et al., 2010; Zink et al., 2018). Although we did not observe paternal methylation  
292 bias across the whole PWS/AS cluster, we did detect a paternal methylation block spanning ~200Kb,  
293 immediately downstream of the known maternally methylated PWS *SNURF/SNRPN* ICR. This block  
294 encompasses the *SNORD116* cluster and other adjacent genes with strong paternal expression  
295 (Supplementary figure S3). Probes with paternal methylation bias at the *SNORD116* cluster have been  
296 reported which span about 95Kb region and paternal deletion of this cluster results in PWS phenotypes  
297 (Hernandez Mora et al., 2018; Joshi et al., 2016; Matsubara et al., 2019). Slight hypomethylation of  
298 *SNORD116* cluster in cases with PWS phenotype and hypermethylation in the cases with AS phenotype  
299 have been reported (Matsubara et al., 2019). Our analysis extends and more clearly delineates this  
300 paternally biased block.

301 Beyond the PWS/AS cluster, we detected another six blocks of allelic methylation bias (Supplementary  
302 figure S6-S11). All of the blocks represented several features in common. 1) They were detected in  
303 imprinted genes that appeared in cluster. 2) All of them were accompanied by a strong PofO expression  
304 bias from the subtle hypermethylated allele. 3) There was at least one well-characterized and conserved  
305 gDMR in each block (except *ZNF597/NAA60* block with a conserved sDMR). 4) The well-characterized  
306 DMRs in these blocks displayed significant allelic H3K4me3 (except DMR in *L3MBTL1* block which  
307 could not be examined due to the lack of SNV). 5) Well-characterized DMRs in these blocks overlapped  
308 to the promoter of genes with subtle PofO methylation bias at the gene body and DMR itself displayed

309 opposite PofO methylation (except for *ZDBF2/GPR1-AS* block that DMR did not mapped to the promoter  
310 and had the same PofO with the gene body). This represents a novel facet of imprinting biology. To explain  
311 this, we can consider that CpG methylation at gene bodies is positively (but weakly) correlated with gene  
312 expression (Ball et al., 2009; Yang et al., 2014). Within these blocks, we saw parental methylation bias at  
313 the parentally expressed or active allele. This may suggest that subtle parental methylation is linked to  
314 parental ASE. However, ASE is observed in many other imprinted genes whose gene bodies do not show  
315 parental methylation bias. One possible explanation could be that the subtle parental methylation bias is  
316 used by cells to express important genes (genes which can regulate other genes in the cluster or have  
317 regulatory roles) in an imprinted cluster with higher fidelity through its gene body methylation on active  
318 allele. For example, at the *KCNQ1OT1* and *GNAS* clusters the methylation blocks overlap *KCNQ1OT1*  
319 and *GNAS-AS1* genes both of which encode antisense RNA transcripts that regulate other genes in the  
320 imprinted cluster (Chiesa et al., 2012; Turan and Bastepe, 2013). However, further studies are needed to  
321 reveal the mechanism producing these contiguous slight parental methylation bias blocks and their  
322 functional role.

323 Orthologous regions of ~72% of the detected DMRs were demonstrated significant partial methylation in  
324 at least one of the chimp, rhesus, and mouse. There were a considerably higher number of orthologous  
325 sites and significant orthologous DMRs in chimp and rhesus in agreement with more similarities and less  
326 distance to these primates compare to mouse in the human evolution. Orthologs of the 12 novel DMRs  
327 were mostly displayed significant partial methylation in rhesus and/or chimp while the other 16 novel  
328 DMRs were not significant in any of the examined mammals (Figure 4). This suggests that the novel  
329 DMRs (except one which had significant orthologous in mouse) are established after divergence of  
330 primates' common ancestor from mouse and majority of them established after the divergence of human  
331 common ancestor from chimp. Court *et al.* detected 14 novel DMRs, at the time of their study, and did  
332 not detect any imprinted orthologs of their novel DMRs in mouse (Court et al., 2014). All 14 also

333 overlapped with our detected DMRs and six of them had orthologous regions in mm10 using the UCSC  
334 liftover file (Kent et al., 2002). Two of the orthologs displayed partial methylation in mouse, one in *Rian*  
335 gene which did not examined in Court *et al.* and the other in *Htr5a* gene which reported not to be conserved  
336 in mouse by Court *et al.* (Court et al., 2014). When looking into their analysis, it seems that they examined  
337 different orthologous region (Supplementary figure S19). For *Htr5a*, they examined the CpG island  
338 (CpG:\_102) ~50 kb away from the gene while we examined the region spanning the first or second exon  
339 (two transcripts) of *Htr5a* which was partially methylated while CpG:\_102 was also unmethylated in our  
340 study.

341 Using reported imprinted genes, 50% of the novel DMRs mapped close to known imprinted genes (Babak  
342 et al., 2015; Baran et al., 2015; “Geneimprint,” 2021; Jadhav et al., 2019; Morison et al., 2001; Zink et al.,  
343 2018). Five of our novel gDMRs could be potential ICRs for reported imprinted genes without reported  
344 ICR. Specifically, maternal methylation of CpG island overlapping promoter of *ZNF714* as it can directly  
345 repress maternal allele and results in the reported paternal expression (Figure 5) (Jadhav et al., 2019; Zink  
346 et al., 2018). *ZNF714* is a member of the zinc finger family proteins which have several imprinted genes  
347 with developmental roles (Babak et al., 2015; Baran et al., 2015; Camargo et al., 2012; Jadhav et al., 2019;  
348 Zink et al., 2018). *ZNF714* has been reported to be associated with non-syndromic cleft lip (Camargo et  
349 al., 2012). Thus, this new imprinted DMR could be of potential clinical value. In contrast to imprinting  
350 which is established in the germline and usually consistent across tissues, allelic expression is only present  
351 if the imprinted gene is expressed in the tissue. Moreover, studies have used short read sequencing to  
352 detect ASE which is confounded with several limitations (Aird et al., 2011; Steijger et al., 2013).  
353 Therefore, a comprehensive ASE analysis using long-read technologies capturing various tissues might  
354 explain ASE around the novel DMRs without evidence of a close imprinted gene. Paternal expression bias  
355 of *PTCHD3* and maternal expression bias for *FANCC* are detected in Zink *et al.* while they could not  
356 detect any associated DMR (Zink et al., 2018). Hernandez *et al.* detected 3 and 1 maternally methylated

357 probes at the promoter of *PTCHD3* and intron one of *FANCC*, respectively, but were not able to examine  
358 the parental expression (Hernandez Mora et al., 2018). We also detected two maternally methylated  
359 gDMRs overlapping the promoter of *PCTHD3* and intron one of *FANCC* (Supplementary figures S17 and  
360 S18). There were no phased CpG for these DMRs in Zink *et al.* study (Supplementary file 6). Orthologous  
361 regions for the *PTCHD3* DMR were also detected to be partially methylated in all three mammals but the  
362 *FANCC* DMR was only partially methylated in chimp. These gDMRs could potentially explain the  
363 missing ICR for ASE of these genes. The gDMR at the *PTCHD3* promoter can directly suppress maternal  
364 allele. *FANCC* gDMR overlaps to a CpG island and CTCF binding site. CTCF is a methylation sensitive  
365 DNA-binding protein and CpG methylation can inhibit CTCF binding (Hashimoto et al., 2017; Renda et  
366 al., 2007). Moreover, CTCF binding to the first intron of major immediate-early gene of the human  
367 cytomegalovirus (HCMV) in HCMV-infected cells resulted in repression of this gene (Puerta et al., 2014).  
368 Therefore, the maternally methylated DMR in intron 1 of maternally expressed *FANCC* suggests a  
369 mechanism through which paternal allele is suppressed by CTCF binding at DMR while DNA methylation  
370 inhibits CTCF binding at maternal allele.

371 Overall, our study represents a near-complete genome-wide map of human allele-specific methylation by  
372 leveraging long-read nanopore technology. This allowed us to expand the set of reported imprinted DMRs  
373 using just 12 LCLs with parental SNPs and explain novel DMRs as potential ICRs for several imprinted  
374 genes with unknown ICR. 43% of the novel DMRs demonstrated partial methylation in other mammals  
375 suggesting their conservation. We detected seven large PofO bias methylation blocks spanning multiple  
376 kilobasesd and displaying several features in common. We have suggested two avenues of further  
377 investigation: 1) Looking for tissue and individual polymorphism in imprinting, and 2) determining the  
378 mechanism and function of the subtle parental bias blocks. We have also shown that nanopore sequencing  
379 is a cheap and easy way to call ICRs and can open the way to answering those questions in future. This  
380 study provides a blueprint for further surveys using nanopore sequence data and demonstrates the potential



381 of this approach to study personalized allelic methylation in disease such as cancer with wide spread allelic  
382 methylation aberrations.

## 383 **Materials and Methods**

### 384 **Nanopore Sequencing Data and Detection of Allele-Specific Methylation**

385 We used publicly available nanopore sequencing data for 12 LCLs with trio data available. Raw and  
386 basecalled nanopore data for HG002, HG005, HG00733, HG01109, HG01243, HG02055, HG02080,  
387 HG02723, HG03098, and HG03492 obtained from Human Pangenomics and GIAB (Shafin et al., 2020;  
388 Zook et al., 2016). NA19240 data (ERR3046934 and ERR3046935 raw nanopore and their basecalled  
389 reads ERR3219853 and ERR3219854) obtained from De Coster et al (De Coster et al., 2019). Raw and  
390 basecalled nanopore data for NA12878 obtained from rel6 nanopore WGS consortium (Jain et al., 2018).  
391 Basecalled reads mapped to GRCh38 using Minimap2 with the setting *minimap2 -ax map-ont* (Kent et  
392 al., 2002; Li, 2018). Subsequently, CpG methylations were called using nanopolish with default  
393 parameters (Simpson et al., 2017). Methylation calls for each sample preprocessed using NanoMethPhase  
394 *methyl\_call\_processor* default setting for downstream analysis (Akbari et al., 2021). To detect allelic  
395 methylation we used high quality SNVs for each cell line and it's parents. For all the cell lines and parents,  
396 except HG002 and HG005, high quality SNVs were called using Strelka2 with default parameters from  
397 alignment files in the 1KGP GRCh38 (Auton et al., 2015; Kim et al., 2018). High quality SNVs for HG002  
398 and HG005 and their parents were obtained from GIAB v.3.3.2 high confidence variant calls (Zook et al.,  
399 2019). For each LCL a mock phased vcf file with defined parent of origin of each high-quality  
400 heterozygous SNV was created using an in-house bash script  
401 (<https://github.com/vahidAK/NanoMethPhase/tree/master/scripts>: Trio\_To\_PhaseVCF\_4FemaleChild.sh  
402 & Trio\_To\_PhaseVCF\_4MaleChild.sh). Subsequently, we detected haplotype methylome in each sample  
403 using NanoMethPhase with the setting *nanomethphase phase -mbq 0*. Finally, DMRs between haplotypes  
404 were called using default setting of NanoMethPhase *dma* module that uses Dispersion Shrinkage for  
405 Sequencing data (DSS) R package for DMA and performs a Wald test at each CpG site (Park and Wu,  
406 2016). To avoid the confounding effects of X-inactivation, and because previous studies demonstrated no

407 evidence of imprinting at sex chromosomes, we only examined autosomal chromosomes (Court et al.,  
408 2014; Joshi et al., 2016; Zink et al., 2018).

#### 409 **WGBS Data and Detection of Novel DMRs**

410 To validate allelic methylation in other tissues and also detect potential novel ICRs we used 24 public  
411 WGBS (GSM1010978, GSM1010979, GSM1010980, GSM1010981, GSM1010983, GSM1010984,  
412 GSM1010986, GSM1010987, GSM1010988, GSM1010989, GSM1112838, GSM1120321,  
413 GSM1120326, GSM1127054, GSM1127125, GSM916049, GSM916050, GSM983645, GSM983647,  
414 GSM983648, GSM983649, GSM983650, GSM983651, GSM983652) for 20 tissue type samples from  
415 Epigenomics Roadmap including adipose, adrenal gland, liver, aorta, brain hippocampus, breast luminal  
416 epithelial, breast myoepithelial, esophagus, gastric, left ventricle, lung, ovary, pancreas, psoas muscle,  
417 right atrium, right ventricle, sigmoid colon, small intestine, spleen, and thymus (Bernstein et al., 2010).  
418 Wig files which include fractional methylation data were obtained and converted to bed format using  
419 UCSC tools and lifted over to hg38 coordinates using CrossMap and UCSC lift over chain file (Kent et  
420 al., 2002; Zhao et al., 2014). All, bed format files were then merged to keep CpGs that are common in at  
421 least 10 samples. At imprinting control regions only one allele is methylated and we expect to observe  
422 partial methylation (~50%) at such regions. However, the adjacent sites which are not imprinted display  
423 ~0% or ~100% methylation. Therefore, we used a comparison between detected DMRs with their adjacent  
424 sites in WGBS data. For each DMR we determined the number of CpG sites with methylation rates  
425 between 30-70% (partial methylation) and normalized it by dividing the numbers to all CpGs in the  
426 interval. We also determined this ratio for the adjacent sites ( $\geq 20$ kb away and not been reported as  
427 imprinted gene or ICR). We then used limma's linear model to perform statistical analysis of the ratios at  
428 each DMR and adjacent sites (Codes are available on  
429 <https://github.com/vahidAK/NanoMethPhase/tree/master/scripts>:  
430 PartialCpGMethylationAtDMRandAdjacent.py &

431 ComparePartialMethylationAtDMRsToAdjacentUsingLimma.R). As controls and because ICRs are  
432 usually overlapped with CpG islands, we examined 200 randomly selected CpG islands and 200 randomly  
433 selected 1kb, 2kb, and 3kb intervals with more than 15 CpGs.

#### 434 **Detection of Germline and Somatic DMRs**

435 If a DMR is germline, it is established during germ cell development and survived the pre-implantation  
436 methylation reprogramming. Therefore, gDMRs will overlap with DMR detected from oocyte vs sperm  
437 with consistent methylation direction, i.e. maternally methylated DMRs display high methylation in  
438 oocyte and very low or no methylation in sperm and vice versa. Moreover, gDMRs need to display partial  
439 methylation after fertilization and early development.

440 In order to discriminate gDMRs from somatic, we used public WGBS data for 3 sperm and 2 oocyte, and  
441 1 blastocysts libraries and 3 fetal tissue types (GSM1172595 thymus, GSM1172596 muscle, GSM941747  
442 brain) (Bernstein et al., 2010; Okae et al., 2014). Read counts for methylated and unmethylated CpG sites  
443 were obtained for sperm and oocyte samples and DMA was performed using NanoMethPhase *dma*  
444 module. To detect potential candidate gDMRs, we overlapped detected DMRs from oocyte vs sperm  
445 DMA to detected imprinted DMRs from nanopore. We further used blastocysts and fetal tissues to  
446 investigate if potential gDMRs escaped the second round of methylation reprogramming and if sDMRs are  
447 established during somatic development.

#### 448 **Allelic H3K4me3 Analysis**

449 H3K4me3 ChIP-seq fastq files were obtained for NA12878, NA12891, NA12892, NA19238, NA19239,  
450 NA19240, and NA18507 (SRA: SRP044271) and aligned to the GRCh38 reference genome using bwa-  
451 mem default setting (Adoue et al., 2014; Kent et al., 2002; Li and Durbin, 2009). High quality SNVs were  
452 called for these samples from 1KGP GRCh38 alignment files using strelka2 (Auton et al., 2015; Kim et  
453 al., 2018). We then counted the number of reads with minimum mapping quality of 20 and base quality

454 of 10 at each heterozygous SNV and kept those with more than 5 mapped reads for binomial test. The  
455 reference allelic counts and total counts at each heterozygous SNV (or maternal allelic counts and total  
456 counts in case for trios) were used to detect significant allelic bias using a two-sided binomial test under  
457 the default probability of  $P = 0.5$  in python SciPy package (Codes are available on  
458 <https://github.com/vahidAK/NanoMethPhase/tree/master/scripts>: CountReadsAtSNV.py &  
459 Binomial\_test.py) (Virtanen et al., 2020).

#### 460 **Mammalian Conservation of DMRs**

461 To test whether any of the detected novel DMRs are conserved in other mammals we used 17 WGBS  
462 datasets for mus musculus (GSE42836, includes 17 tissue types), 34 WGBS datasets for rhesus macaque  
463 (GSE34128, includes 6 peripheral blood samples. GSE151768 includes 15 NeuN+ and 13 OLIG2+ brain  
464 samples), and 22 WGBS datasets for chimpanzee (GSE151768, includes 11 NeuN+ and 11 OLIG2+ brain  
465 samples) to examine partial methylation in orthologous intervals (Hon et al., 2013; Jeong et al., 2021;  
466 Tung et al., 2012). Mouse, Macaque, and Chimp coordinates lifted over to mm10, RheMac8, and PanTro5  
467 coordinates using CrossMap and appropriate liftover file from UCSC, if they were not already in this  
468 coordinates. The list of detected human DMRs were also converted to the orthologous regions for each  
469 mammal using CrossMap and the appropriate UCSC liftover file (Kent et al., 2002; Zhao et al., 2014).  
470 Since many coordinates in human splinted to several orthologous in other mammals, we merged  
471 orthologous intervals which were  $\leq 200$ bp apart. Finally, we used our approach explained in  
472 aforementioned section (WGBS Data and Detection of Novel DMRs) to detect orthologs with significant  
473 partial methylation.

474 To examine the somatic and germline orthologous DMRs, we used two embryo (GSM3752614,  
475 GSM4558210) , one sperm (GSE79226, combined methylation frequencies from three replicates), and  
476 three oocyte (GSM3681773, GSM3681774, GSM3681775) WGBS libraries from mouse; And one

477 embryo (GSM1466814), one sperm (GSM1466810), and one oocyte (GSM1466811) WGBS libraries  
478 from rhesus macaque (Dahlet et al., 2020; Gao et al., 2017; Jung et al., 2017; Saenz-de-Juano et al., 2019).

479 **Acknowledgements:** SJMJ and MAM acknowledge funding from the Canada Research Chairs  
480 program and the Canadian Foundation for Innovation. VA acknowledges funding from the University of  
481 British Columbia Four Year Doctoral Fellowship.

482 **Competing interests:** The authors declare that there is no competing interests.

## 483 **References**

- 484 Adoue V, Schiavi A, Light N, Almlöf JC, Lundmark P, Ge B, Kwan T, Caron M, Rönnblom L, Wang C,  
485 Chen S-H, Goodall AH, Cambien F, Deloukas P, Ouwehand WH, Syvänen A-C, Pastinen T. 2014.  
486 Allelic expression mapping across cellular lineages to establish impact of non-coding SNPs. *Mol*  
487 *Syst Biol* **10**:754.
- 488 Aird D, Ross MG, Chen W-S, Danielsson M, Fennell T, Russ C, Jaffe DB, Nusbaum C, Gnirke A. 2011.  
489 Analyzing and minimizing PCR amplification bias in Illumina sequencing libraries. *Genome Biol*  
490 **12**:1–14.
- 491 Akbari V, Garant J-M, O’Neill K, Pandoh P, Moore R, Marra MA, Hirst M, Jones SJM. 2021.  
492 Megabase-scale methylation phasing using nanopore long reads and NanoMethPhase. *Genome Biol*  
493 **22**:68.
- 494 Amemiya HM, Kundaje A, Boyle AP. 2019. The ENCODE Blacklist: Identification of Problematic  
495 Regions of the Genome. *Sci Rep* **9**:9354.
- 496 Auton A, Brooks LD, Durbin RM, Garrison EP, Kang HM, Korbel JO, Marchini JL, McCarthy S,  
497 McVean GA, Abecasis GR, 1000 Genomes Project Consortium. 2015. A global reference for  
498 human genetic variation. *Nature* **526**:68–74.
- 499 Babak T, DeVeale B, Tsang EK, Zhou Y, Li X, Smith KS, Kukurba KR, Zhang R, Li JB, van der Kooy  
500 D. 2015. Genetic conflict reflected in tissue-specific maps of genomic imprinting in human and  
501 mouse. *Nat Genet* **47**:544–549.
- 502 Ball MP, Li JB, Gao Y, Lee J-H, LeProust EM, Park I-H, Xie B, Daley GQ, Church GM. 2009.  
503 Targeted and genome-scale strategies reveal gene-body methylation signatures in human cells. *Nat*  
504 *Biotechnol* **27**:361–368.
- 505 Baran Y, Subramaniam M, Biton A, Tukiainen T, Tsang EK, Rivas MA, Pirinen M, Gutierrez-Arcelus  
506 M, Smith KS, Kukurba KR. 2015. The landscape of genomic imprinting across diverse adult  
507 human tissues. *Genome Res* **25**:927–936.
- 508 Bartolomei MS, Ferguson-Smith AC. 2011. Mammalian Genomic Imprinting. *Cold Spring Harb*  
509 *Perspect Biol* **3**.
- 510 Bernstein BE, Stamatoyannopoulos JA, Costello JF, Ren B, Milosavljevic A, Meissner A, Kellis M,  
511 Marra MA, Beaudet AL, Ecker JR, Farnham PJ, Hirst M, Lander ES, Mikkelsen TS, Thomson JA.  
512 2010. The NIH Roadmap Epigenomics Mapping Consortium. *Nat Biotechnol* **28**:1045–1048.
- 513 Camargo M, Rivera D, Moreno L, Lidral AC, Harper U, Jones M, Solomon BD, Roessler E, Vélez JI,  
514 Martínez AF, Chandrasekharappa SC, Arcos-Burgos M. 2012. GWAS reveals new recessive loci  
515 associated with non-syndromic facial clefting. *Eur J Med Genet* **55**:510–514.
- 516 Chen Z, Zhang Y. 2020. Maternal H3K27me3-dependent autosomal and X chromosome imprinting. *Nat*  
517 *Rev Genet* **21**:555–571.
- 518 Cheong CY, Chng K, Ng S, Chew SB, Chan L, Ferguson-Smith AC. 2015. Germline and somatic  
519 imprinting in the nonhuman primate highlights species differences in oocyte methylation. *Genome*  
520 *Res* **25**:611–623.
- 521 Chess A. 2013. Random and non-random monoallelic expression. *Neuropsychopharmacology* **38**:55–61.



- 522 Chiesa N, De Crescenzo A, Mishra K, Perone L, Carella M, Palumbo O, Mussa A, Sparago A, Cerrato  
523 F, Russo S, Lapi E, Cubellis MV, Kanduri C, Cirillo Silengo M, Riccio A, Ferrero GB. 2012. The  
524 KCNQ1OT1 imprinting control region and non-coding RNA: new properties derived from the  
525 study of Beckwith-Wiedemann syndrome and Silver-Russell syndrome cases. *Hum Mol Genet*  
526 **21**:10–25.
- 527 Court F, Tayama C, Romanelli V, Martin-Trujillo A, Iglesias-Platas I, Okamura K, Sugahara N, Simón  
528 C, Moore H, Harness J V., Keirstead H, Sanchez-Mut JV, Kaneki E, Lapunzina P, Soejima H,  
529 Wake N, Esteller M, Ogata T, Hata K, Nakabayashi K, Monk D. 2014. Genome-wide parent-of-  
530 origin DNA methylation analysis reveals the intricacies of human imprinting and suggests a  
531 germline methylation-independent mechanism of establishment. *Genome Res* **24**:554–569.
- 532 da Rocha ST, Gendrel A-V. 2019. The influence of DNA methylation on monoallelic expression. *Essays*  
533 *Biochem* **63**:663–676.
- 534 Dahlet T, Argüeso Lleida A, Al Adhami H, Dumas M, Bender A, Ngondo RP, Tanguy M, Vallet J,  
535 Auclair G, Bardet AF, Weber M. 2020. Genome-wide analysis in the mouse embryo reveals the  
536 importance of DNA methylation for transcription integrity. *Nat Commun* **11**:3153.
- 537 De Coster W, De Rijk P, De Roeck A, De Pooter T, D’Hert S, Strazisar M, Slegers K, Van  
538 Broeckhoven C. 2019. Structural variants identified by Oxford Nanopore PromethION sequencing  
539 of the human genome. *Genome Res* **29**:1178–1187.
- 540 Gao F, Niu Y, Sun YE, Lu H, Chen Y, Li S, Kang Y, Luo Y, Si C, Yu J, Li C, Sun N, Si W, Wang H, Ji  
541 W, Tan T. 2017. De novo DNA methylation during monkey pre-implantation embryogenesis. *Cell*  
542 *Res* **27**:526–539.
- 543 Geneimprint. 2021. <http://www.geneimprint.com>
- 544 Gigante S, Gouil Q, Lucattini A, Keniry A, Beck T, Tinning M, Gordon L, Woodruff C, Speed TP,  
545 Blewitt ME, Ritchie ME. 2019. Using long-read sequencing to detect imprinted DNA methylation.  
546 *Nucleic Acids Res* **47**:e46–e46.
- 547 Goovaerts T, Steyaert S, Vandebussche CA, Galle J, Thas O, Van Criekinge W, De Meyer T. 2018. A  
548 comprehensive overview of genomic imprinting in breast and its deregulation in cancer. *Nat*  
549 *Commun* **9**:1–14.
- 550 Hanna CW, Kelsey G. 2014. The specification of imprints in mammals. *Heredity (Edinb)* **113**:176–183.
- 551 Hashimoto H, Wang D, Horton JR, Zhang X, Corces VG, Cheng X. 2017. Structural Basis for the  
552 Versatile and Methylation-Dependent Binding of CTCF to DNA. *Mol Cell* **66**:711–720.e3.
- 553 Hernandez Mora JR, Tayama C, Sánchez-Delgado M, Monteagudo-Sánchez A, Hata K, Ogata T,  
554 Medrano J, Poo-Llanillo ME, Simón C, Moran S, Esteller M, Tenorio J, Lapunzina P, Kagami M,  
555 Monk D, Nakabayashi K. 2018. Characterization of parent-of-origin methylation using the Illumina  
556 Infinium MethylationEPIC array platform. *Epigenomics* **10**:941–954.
- 557 Hon GC, Rajagopal N, Shen Y, McCleary DF, Yue F, Dang MD, Ren B. 2013. Epigenetic memory at  
558 embryonic enhancers identified in DNA methylation maps from adult mouse tissues. *Nat Genet*  
559 **45**:1198–1206.
- 560 Jadhav B, Monajemi R, Galalova KK, Ho D, Draisma HHM, van de Wiel MA, Franke L, Heijmans BT,  
561 van Meurs J, Jansen R, Consortium G, Consortium B, ’t Hoen PAC, Sharp AJ, Kiełbasa SM. 2019.  
562 RNA-Seq in 296 phased trios provides a high-resolution map of genomic imprinting. *BMC Biol*

- 563           **17:50.**
- 564 Jain M, Koren S, Miga KH, Quick J, Rand AC, Sasani TA, Tyson JR, Beggs AD, Dilthey AT, Fiddes  
565 IT, Malla S, Marriott H, Nieto T, O’Grady J, Olsen HE, Pedersen BS, Rhie A, Richardson H,  
566 Quinlan AR, Snutch TP, Tee L, Paten B, Phillippy AM, Simpson JT, Loman NJ, Loose M. 2018.  
567 Nanopore sequencing and assembly of a human genome with ultra-long reads. *Nat Biotechnol*  
568 **36**:338–345.
- 569 Jelinic P, Shaw P. 2007. Loss of imprinting and cancer. *J Pathol* **211**:261–268.
- 570 Jeong H, Mendizabal I, Berto S, Chatterjee P, Layman T, Usui N, Toriumi K, Douglas C, Singh D, Huh  
571 I, Preuss TM, Konopka G, Yi S V. 2021. Evolution of DNA methylation in the human brain. *Nat*  
572 *Commun* **12**:2021.
- 573 John RM, Lefebvre L. 2011. Developmental regulation of somatic imprints. *Differentiation* **81**:270–280.
- 574 Joshi RS, Garg P, Zaitlen N, Lappalainen T, Watson CT, Azam N, Ho D, Li X, Antonarakis SE,  
575 Brunner HG, Buiting K, Cheung SW, Coffee B, Eggermann T, Francis D, Geraedts JP, Gimelli G,  
576 Jacobson SG, Le Caignec C, de Leeuw N, Liehr T, Mackay DJ, Montgomery SB, Pagnamenta AT,  
577 Papenhausen P, Robinson DO, Ruivenkamp C, Schwartz C, Steiner B, Stevenson DA, Surti U,  
578 Wassink T, Sharp AJ. 2016. DNA Methylation Profiling of Uniparental Disomy Subjects Provides  
579 a Map of Parental Epigenetic Bias in the Human Genome. *Am J Hum Genet* **99**:555–566.
- 580 Jung YH, Sauria MEG, Lyu X, Cheema MS, Ausio J, Taylor J, Corces VG. 2017. Chromatin States in  
581 Mouse Sperm Correlate with Embryonic and Adult Regulatory Landscapes. *Cell Rep* **18**:1366–  
582 1382.
- 583 Kent WJ, Sugnet CW, Furey TS, Roskin KM, Pringle TH, Zahler AM, Haussler D. 2002. The Human  
584 Genome Browser at UCSC. *Genome Res* **12**:996–1006.
- 585 Khamlichi AA, Feil R. 2018. Parallels between mammalian mechanisms of monoallelic gene  
586 expression. *Trends Genet* **34**:954–971.
- 587 Kim S, Scheffler K, Halpern AL, Bekritsky MA, Noh E, Källberg M, Chen X, Kim Y, Beyter D,  
588 Krusche P, Saunders CT. 2018. Strelka2: fast and accurate calling of germline and somatic variants.  
589 *Nat Methods* **15**:591–594.
- 590 Laurent L, Wong E, Li G, Huynh T, Tsigos A, Ong CT, Low HM, Kin Sung KW, Rigoutsos I, Loring  
591 J, Wei C-L. 2010. Dynamic changes in the human methylome during differentiation. *Genome Res*  
592 **20**:320–331.
- 593 Li H. 2018. Minimap2: pairwise alignment for nucleotide sequences. *Bioinformatics* **34**:3094–3100.
- 594 Li H, Durbin R. 2009. Fast and accurate short read alignment with Burrows–Wheeler transform.  
595 *Bioinformatics* **25**:1754–1760.
- 596 Matsubara K, Itoh M, Shimizu K, Saito S, Enomoto K, Nakabayashi K, Hata K, Kurosawa K, Ogata T,  
597 Fukami M, Kagami M. 2019. Exploring the unique function of imprinting control centers in the  
598 PWS/AS-responsible region: finding from array-based methylation analysis in cases with variously  
599 sized microdeletions. *Clin Epigenetics* **11**:36.
- 600 Maupetit-Méhouas S, Montibus B, Nury D, Tayama C, Wassef M, Kota SK, Fogli A, Cerqueira Campos  
601 F, Hata K, Feil R, Margueron R, Nakabayashi K, Court F, Arnaud P. 2016. Imprinting control  
602 regions (ICRs) are marked by mono-allelic bivalent chromatin when transcriptionally inactive.

- 603 *Nucleic Acids Res* **44**:621–635.
- 604 Moore LD, Le T, Fan G. 2013. DNA Methylation and Its Basic Function. *Neuropsychopharmacology*  
605 **38**:23–38.
- 606 Morison IM, Paton CJ, Cleverley SD. 2001. The imprinted gene and parent-of-origin effect database.  
607 *Nucleic Acids Res* **29**:275–276.
- 608 Okae H, Chiba H, Hiura H, Hamada H, Sato A, Utsunomiya T, Kikuchi H, Yoshida H, Tanaka A,  
609 Suyama M, Arima T. 2014. Genome-wide analysis of DNA methylation dynamics during early  
610 human development. *PLoS Genet* **10**:e1004868–e1004868.
- 611 Park Y, Wu H. 2016. Differential methylation analysis for BS-seq data under general experimental  
612 design. *Bioinformatics* **32**:1446–1453.
- 613 Puerta MF, Ruth C, Fang L, Robert P, Zhong D, A. R-MY, S. BM, M. LP, Qiyi T, L. H-F. 2014. CTCF  
614 Binding to the First Intron of the Major Immediate Early (MIE) Gene of Human Cytomegalovirus  
615 (HCMV) Negatively Regulates MIE Gene Expression and HCMV Replication. *J Virol* **88**:7389–  
616 7401.
- 617 Renda M, Baglivo I, Burgess-Beusse B, Esposito S, Fattorusso R, Felsenfeld G, Pedone P V. 2007.  
618 Critical DNA Binding Interactions of the Insulator Protein CTCF: A SMALL NUMBER OF ZINC  
619 FINGERS MEDIATE STRONG BINDING, AND A SINGLE FINGER-DNA INTERACTION  
620 CONTROLS BINDING AT IMPRINTED LOCI \*. *J Biol Chem* **282**:33336–33345.
- 621 Romanelli V, Nakabayashi K, Vizoso M, Moran S, Iglesias-Platas I, Sugahara N, Simón C, Hata K,  
622 Esteller M, Court F, Monk D. 2014. Variable maternal methylation overlapping the  
623 nc886/vtRNA2-1 locus is locked between hypermethylated repeats and is frequently altered in  
624 cancer. *Epigenetics* **9**:783–790.
- 625 Saenz-de-Juano MD, Ivanova E, Billooye K, Herta A-C, Smitz J, Kelsey G, Anckaert E. 2019. Genome-  
626 wide assessment of DNA methylation in mouse oocytes reveals effects associated with in vitro  
627 growth, superovulation, and sexual maturity. *Clin Epigenetics* **11**:197.
- 628 Shafin K, Pesout T, Lorig-Roach R, Haukness M, Olsen HE, Bosworth C, Armstrong J, Tigyi K, Maurer  
629 N, Koren S, Sedlazeck FJ, Marschall T, Mayes S, Costa V, Zook JM, Liu KJ, Kilburn D, Sorensen  
630 M, Munson KM, Vollger MR, Monlong J, Garrison E, Eichler EE, Salama S, Haussler D, Green  
631 RE, Akeson M, Phillippy A, Miga KH, Carnevali P, Jain M, Paten B. 2020. Nanopore sequencing  
632 and the Shasta toolkit enable efficient de novo assembly of eleven human genomes. *Nat Biotechnol*.
- 633 Sharp AJ, Migliavacca E, Dupre Y, Stathaki E, Sailani MR, Baumer A, Schinzel A, Mackay DJ,  
634 Robinson DO, Cobellis G, Cobellis L, Brunner HG, Steiner B, Antonarakis SE. 2010. Methylation  
635 profiling in individuals with uniparental disomy identifies novel differentially methylated regions  
636 on chromosome 15. *Genome Res* **20**:1271–1278.
- 637 Silver MJ, Kessler NJ, Hennig BJ, Dominguez-Salas P, Laritsky E, Baker MS, Coarfa C, Hernandez-  
638 Vargas H, Castelino JM, Routledge MN, Gong YY, Herceg Z, Lee YS, Lee K, Moore SE, Fulford  
639 AJ, Prentice AM, Waterland RA. 2015. Independent genomewide screens identify the tumor  
640 suppressor VTRNA2-1 as a human epiallele responsive to periconceptual environment. *Genome*  
641 *Biol* **16**:118.
- 642 Simpson JT, Workman RE, Zuzarte PC, David M, Dursi LJ, Timp W. 2017. Detecting DNA cytosine  
643 methylation using nanopore sequencing. *Nat Methods* **14**:407.

- 644 Smith ZD, Meissner A. 2013. DNA methylation: roles in mammalian development. *Nat Rev Genet*  
645 **14**:204–220.
- 646 Steijger T, Abril JF, Engström PG, Kokocinski F, Hubbard TJ, Guigó R, Harrow J, Bertone P. 2013.  
647 Assessment of transcript reconstruction methods for RNA-seq. *Nat Methods* **10**:1177–1184.
- 648 Tomizawa S, Sasaki H. 2012. Genomic imprinting and its relevance to congenital disease, infertility,  
649 molar pregnancy and induced pluripotent stem cell. *J Hum Genet* **57**:84–91.
- 650 Tung J, Barreiro LB, Johnson ZP, Hansen KD, Michopoulos V, Toufexis D, Michelini K, Wilson ME,  
651 Gilad Y. 2012. Social environment is associated with gene regulatory variation in the rhesus  
652 macaque immune system. *Proc Natl Acad Sci U S A* **109**:6490–6495.
- 653 Turan S, Bastepe M. 2013. The GNAS complex locus and human diseases associated with loss-of-  
654 function mutations or epimutations within this imprinted gene. *Horm Res Paediatr* **80**:229–241.
- 655 Virtanen P, Gommers R, Oliphant TE, Haberland M, Reddy T, Cournapeau D, Burovski E, Peterson P,  
656 Weckesser W, Bright J, van der Walt SJ, Brett M, Wilson J, Millman KJ, Mayorov N, Nelson ARJ,  
657 Jones E, Kern R, Larson E, Carey CJ, Polat İ, Feng Y, Moore EW, VanderPlas J, Laxalde D,  
658 Perktold J, Cimrman R, Henriksen I, Quintero EA, Harris CR, Archibald AM, Ribeiro AH,  
659 Pedregosa F, van Mulbregt P, Vijaykumar A, Bardelli A Pietro, Rothberg A, Hilboll A, Kloeckner  
660 A, Scopatz A, Lee A, Rokem A, Woods CN, Fulton C, Masson C, Häggström C, Fitzgerald C,  
661 Nicholson DA, Hagen DR, Pasechnik D V, Olivetti E, Martin E, Wieser E, Silva F, Lenders F,  
662 Wilhelm F, Young G, Price GA, Ingold G-L, Allen GE, Lee GR, Audren H, Probst I, Dietrich JP,  
663 Silterra J, Webber JT, Slavič J, Nothman J, Buchner J, Kulick J, Schönberger JL, de Miranda  
664 Cardoso JV, Reimer J, Harrington J, Rodríguez JLC, Nunez-Iglesias J, Kuczynski J, Tritz K,  
665 Thoma M, Newville M, Kümmerer M, Bolingbroke M, Tartre M, Pak M, Smith NJ, Nowaczyk N,  
666 Shebanov N, Pavlyk O, Brodtkorb PA, Lee P, McGibbon RT, Feldbauer R, Lewis S, Tygier S,  
667 Sievert S, Vigna S, Peterson S, More S, Pudlik T, Oshima T, Pingel TJ, Robitaille TP, Spura T,  
668 Jones TR, Cera T, Leslie T, Zito T, Krauss T, Upadhyay U, Halchenko YO, Vázquez-Baeza Y,  
669 SciPy 1.0 Contributors. 2020. SciPy 1.0: fundamental algorithms for scientific computing in  
670 Python. *Nat Methods* **17**:261–272.
- 671 Xie W, Barr CL, Kim A, Yue F, Lee AY, Eubanks J, Dempster EL, Ren B. 2012. Base-Resolution  
672 Analyses of Sequence and Parent-of-Origin Dependent DNA Methylation in the Mouse Genome.  
673 *Cell* **148**:816–831.
- 674 Yang X, Han H, De Carvalho DD, Lay FD, Jones PA, Liang G. 2014. Gene body methylation can alter  
675 gene expression and is a therapeutic target in cancer. *Cancer Cell* **26**:577–590.
- 676 Zhao H, Sun Z, Wang J, Huang H, Kocher J-P, Wang L. 2014. CrossMap: a versatile tool for coordinate  
677 conversion between genome assemblies. *Bioinformatics* **30**:1006–1007.
- 678 Zink F, Magnusdottir DN, Magnusson OT, Walker NJ, Morris TJ, Sigurdsson A, Halldorsson GH,  
679 Gudjonsson SA, Melsted P, Ingimundardottir H, Kristmundsdottir S, Alexandersson KF,  
680 Helgadottir A, Gudmundsson J, Rafnar T, Jonsdottir I, Holm H, Eyjolfsson GI, Sigurdardottir O,  
681 Olafsson I, Masson G, Gudbjartsson DF, Thorsteinsdottir U, Halldorsson B V, Stacey SN,  
682 Stefansson K. 2018. Insights into imprinting from parent-of-origin phased methylomes and  
683 transcriptomes. *Nat Genet* **50**:1542–1552.
- 684 Zook JM, Catoe D, McDaniel J, Vang L, Spies N, Sidow A, Weng Z, Liu Y, Mason CE, Alexander N,  
685 Henaff E, McIntyre ABR, Chandramohan D, Chen F, Jaeger E, Moshrefi A, Pham K, Stedman W,  
686 Liang T, Saghbini M, Dzakula Z, Hastie A, Cao H, Deikus G, Schadt E, Sebra R, Bashir A, Truty

687 RM, Chang CC, Gulbahce N, Zhao K, Ghosh S, Hyland F, Fu Y, Chaisson M, Xiao C, Trow J,  
688 Sherry ST, Zaranek AW, Ball M, Bobe J, Estep P, Church GM, Marks P, Kyriazopoulou-  
689 Panagiotopoulou S, Zheng GXY, Schnall-Levin M, Ordonez HS, Mudivarti PA, Giorda K, Sheng  
690 Y, Rypdal KB, Salit M. 2016. Extensive sequencing of seven human genomes to characterize  
691 benchmark reference materials. *Sci Data* **3**:160025.

692 Zook JM, McDaniel J, Olson ND, Wagner J, Parikh H, Heaton H, Irvine SA, Trigg L, Truty R, McLean  
693 CY, De La Vega FM, Xiao C, Sherry S, Salit M. 2019. An open resource for accurately  
694 benchmarking small variant and reference calls. *Nat Biotechnol* **37**:561–566.

695

## 696 **Supplementary Files**

697 **Supplementary File 1:** List of the 383 reported imprinted DMRs from previous studies.

698 **Supplementary File 2:** Detected DMRs using nanopore sequencing data across 12 LCLs and their overlap  
699 to reported DMRs.

700 **Supplementary File 3:** Examining significance of partial methylation of the detected DMRs from  
701 nanopore in 24 WGBS datasets from 20 tissue types. Examining additional 200 randomly selected CGIs,  
702 1kb, 2kb, and 3kb intervals as controls. DNA methylation of the DMRs and their up- and down-stream  
703 regions at each WGBS sample.

704 **Supplementary File 4:** Investigating the significance of partial methylation of the undetected reported  
705 DMRs in 24 WGBS datasets from 20 tissue types.

706 **Supplementary File 5:** Mapping of the undetected reported DMRs to DMRs detected in each nanopore  
707 LCL sample.

708 **Supplementary File 6:** List of the DMRs detected from nanopore data and validated using WGBS data.  
709 Average methylation at 107 nanopore-detected DMRs and validated with WGBS data in LCLs, fetal,  
710 embryos and gamete samples.

711 **Supplementary File 7:** Allelic counts for each heterozygous SNV at the detected DMRs and binomial  
712 test results of H3K4me3 ChIP-seq in 7 LCL samples. Allelic counts for each PofO defined SNV at the  
713 detected DMRs and binomial test results of H3K4me3 ChIP-seq in NA12878 and NA19240 samples.

714 **Supplementary File 8:** Limma results for partial methylation of human DMRs' orthologs in chimpanzee,  
715 rhesus macaque, and mus musculus WGBS data. Average DNA methylation of orthologs in mouse and  
716 rhesus macaque adult tissues and their embryos and gametes.

717 **Supplementary File 9:** List of the 259 known imprinted genes.

718 **Supplementary File 10:** Mapping detected DMRs to close vicinity of the known imprinted genes.

719 **Supplementary Figures:** DMRs covered by each nanopore LCL sample and various IGV screenshots of

720 the novel imprinted DMRs and blocks.
